# Supplementary material for: Ectopic expression of a novel CD22 splice-variant regulates survival and proliferation in malignant T cells from cutaneous T cell lymphoma (CTCL) patients
Source: PubMed Central journal article supplement (PMC4546473; doi:10.18632/oncotarget.3720), 2015-03-30
Supplement: oncotarget-06-14374-s001.pdf [file oncotarget-06-14374-s001.pdf]

## Ectopic expression of a novel CD22 splice-variant regulates survival and proliferation in malignant T cells from cutaneous T cell lymphoma (CTCL) patients

### Supplementary Material

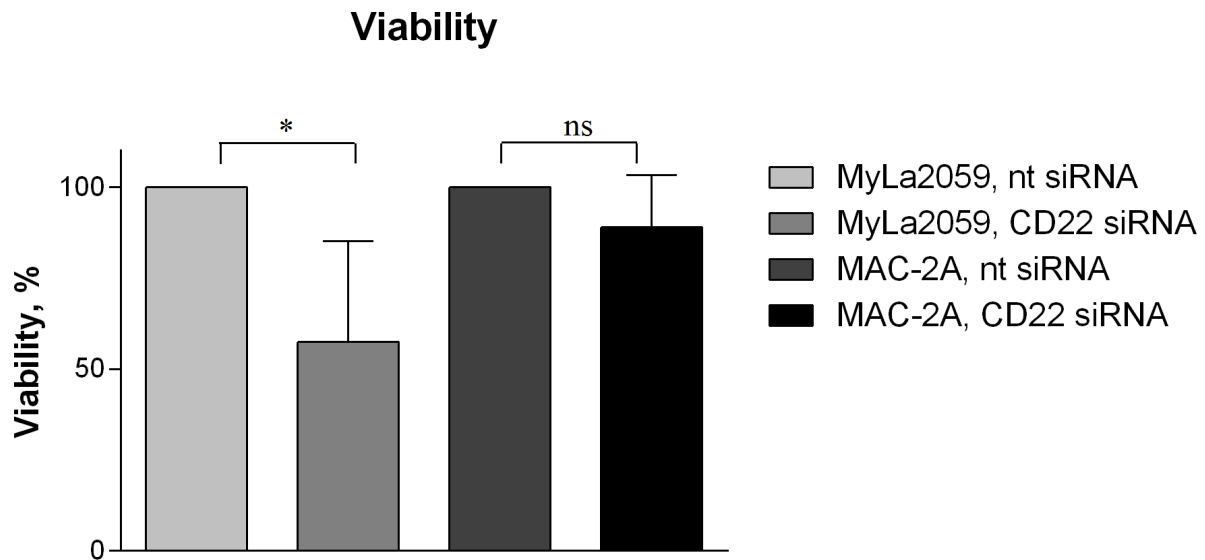

**Supplementary Figure 1:** Silencing of CD22. MyLa2059 and MAC-2A cell lines were transfected with either non-targeting (-) or CD22-targeting (+) siRNA and cell viability were evaluated 24 hours after transfection in a MTT assay. Results are representative of 5 independent experiments. Significant differences between non-targeting and CD22-targeting siRNA treated cells were evaluated using a paired two-tailed Student's t-test.
